# Supplementary material for: A new charge transfer pathway in the MoSe2–WSe2 heterostructure under the conditions of B-excitons being resonantly pumped
Source: Royal Society of Chemistry journal article supplement (doi:10.1039/d3cp05282f), 2024-01-01
Supplement: d3cp05282f1.pdf [file d3cp05282f1.pdf]

## **Supplementary material**

### **A new charge transfer pathway in MoSe<sub>2</sub>-WSe<sub>2</sub> heterostructure under the condition of B-excitons resonantly pumped**

Zifan Hu, Hai Wang, Lei Wang, and Haiyu Wang\*

State Key Laboratory of Integrated Optoelectronics, College of Electronic Science  
and Engineering, Jilin University, Changchun 130012, China. E-mail:

Haiyu\_wang@jlu.edu.cn

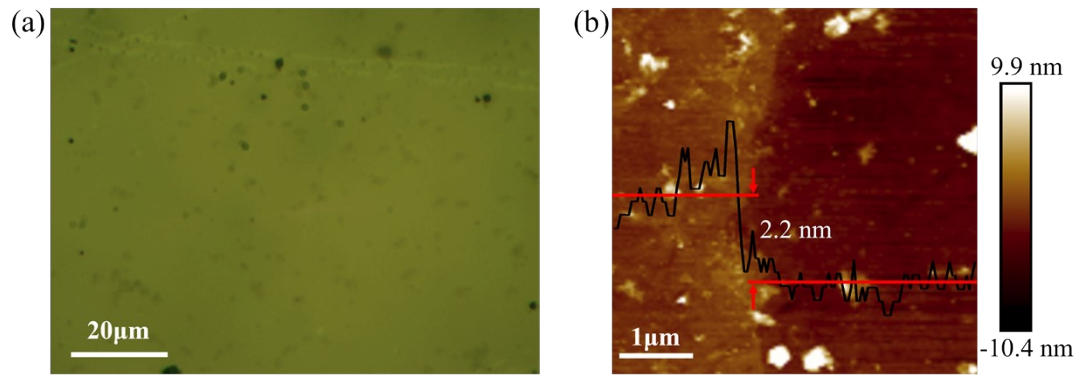

**Figure S1** a) The optical images of MoSe<sub>2</sub>-WSe<sub>2</sub> heterostructure. b) AFM characterization of the MoSe<sub>2</sub>-WSe<sub>2</sub> heterostructure.

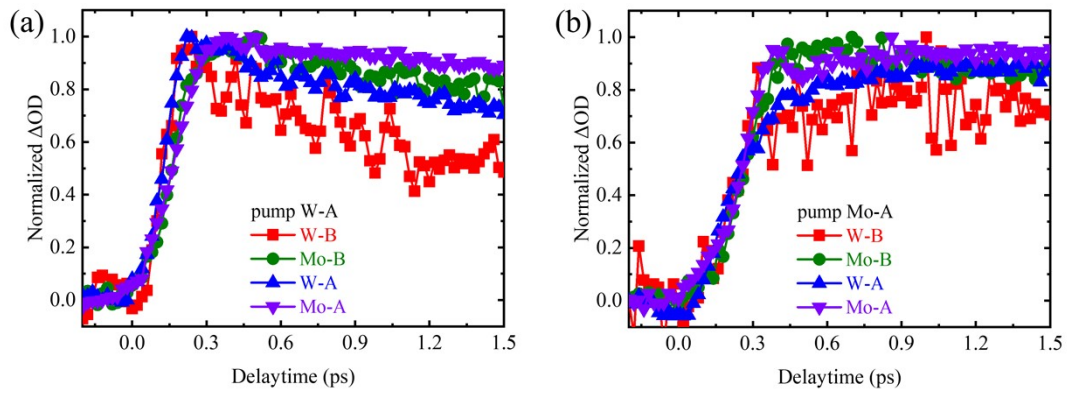

**Figure S2** Dynamics of A- and B-excitons of MoSe<sub>2</sub>-WSe<sub>2</sub> HS in the initial stage under conditions of a) W-A and b) Mo-A resonantly pumped.

Under conditions of W-A and Mo-A resonantly pumped, A- and B-excitons in the WSe<sub>2</sub> layer of MoSe<sub>2</sub>-WSe<sub>2</sub> HS had synchronous build-up dynamics, as same as A- and B-excitons in the MoSe<sub>2</sub> layer. Because only A-excitons in the WSe<sub>2</sub> or MoSe<sub>2</sub> layer were pumped, the charge transfer process occurs through the energy state with lower energy corresponding to A-excitons.

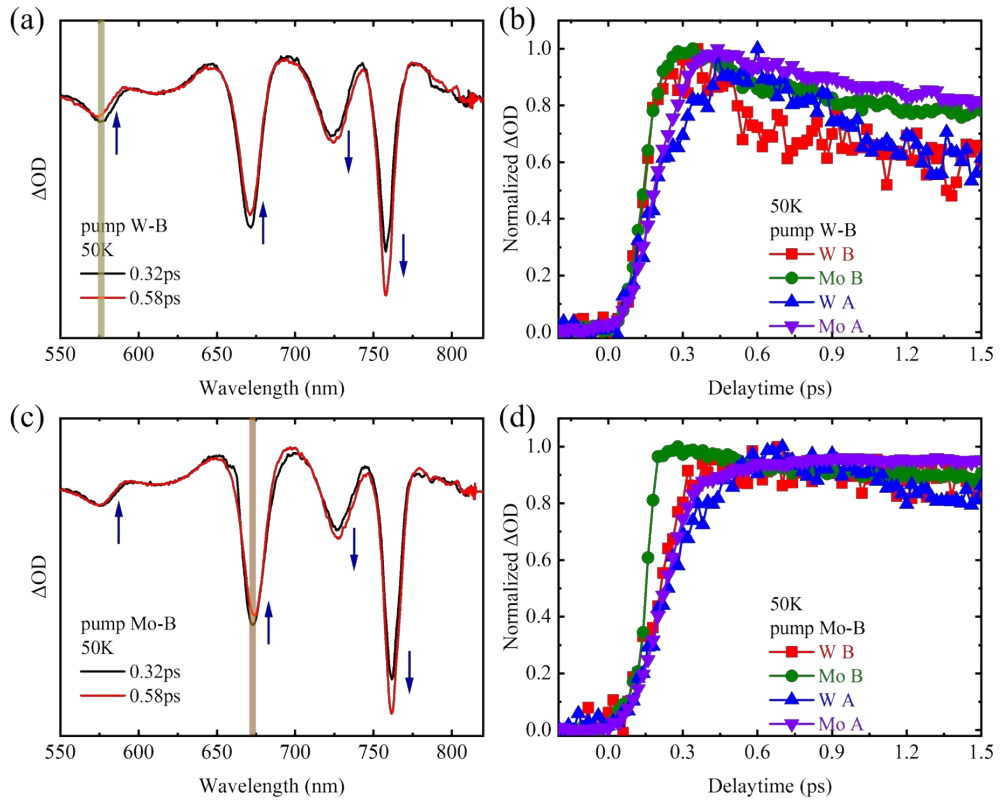

**Figure S3** The TA spectra of MoSe<sub>2</sub>-WSe<sub>2</sub> at time delays of 0.32 and 0.58 ps at a temperature of 50 K upon being pumped by 580 nm and 670 nm light are shown in a) and c). The dynamics of A and B-excitons in MoSe<sub>2</sub>-WSe<sub>2</sub> at a temperature of 50 K during the initial stage upon being pumped by 580 nm and 670 nm light are shown in b) and d).

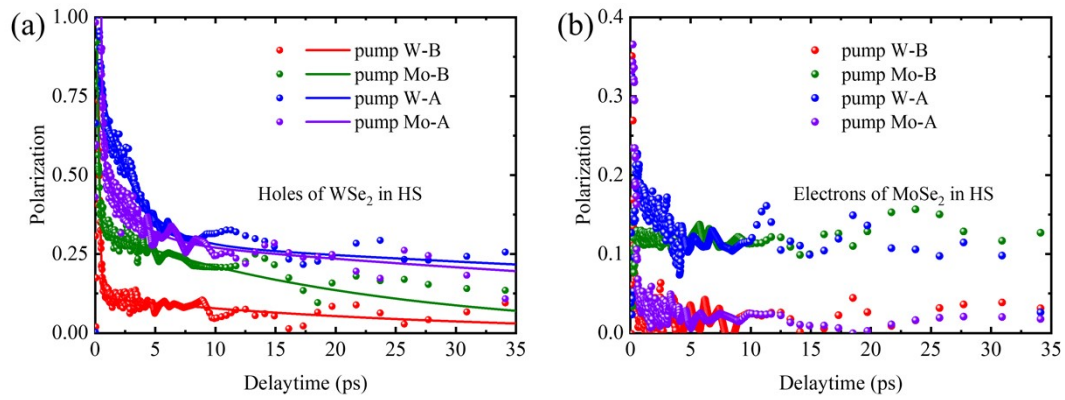

**Figure S4** Polarization dynamics of a) holes of WSe<sub>2</sub> and b) electrons of MoSe<sub>2</sub> in the heterostructure under conditions of W-B (red), Mo-B (olive), W-A (blue), and Mo-A (violet) resonantly pumped. The solid lines are the fitted curves.

Due to a poor signal-to-noise ratio near 800 nm of probe light and small spin-valley polarization of the electrons of MoSe<sub>2</sub> in the heterostructure, it is difficult to fit the depolarization dynamics of the electrons with an exponential function. However, we still could conclude that the depolarization of electrons and holes is no longer synchronous and the polarization of holes is larger than that of electrons under various conditions thanks to the obvious spin-valley polarization of holes.

**Table S1** Best fitting parameters of holes of WSe<sub>2</sub> in MoSe<sub>2</sub>-WSe<sub>2</sub> HS with a Function of  $I(t) \propto \sum_i A_i \exp(-t/\tau_i)$ .

| The wavelength of pump light (nm) | $\tau_1$ (ps) | $\tau_2$ (ps)  | $\tau_3$ (ps) |
|-----------------------------------|---------------|----------------|---------------|
| 590 (pump W-B)                    | 0.13 (84.5%)  | 26.46 (15.5%)  |               |
| 700 (pump Mo-B)                   | 0.14 (66.1%)  | 22.85 (33.9%)  |               |
| 750 (pump W-A)                    | 2.6 (64.0%)   | 117.04 (36.0%) |               |
| 800 (pump Mo-A)                   | 0.13 (47.3%)  | 2.45 (23.2%)   | 82.25 (29.5%) |

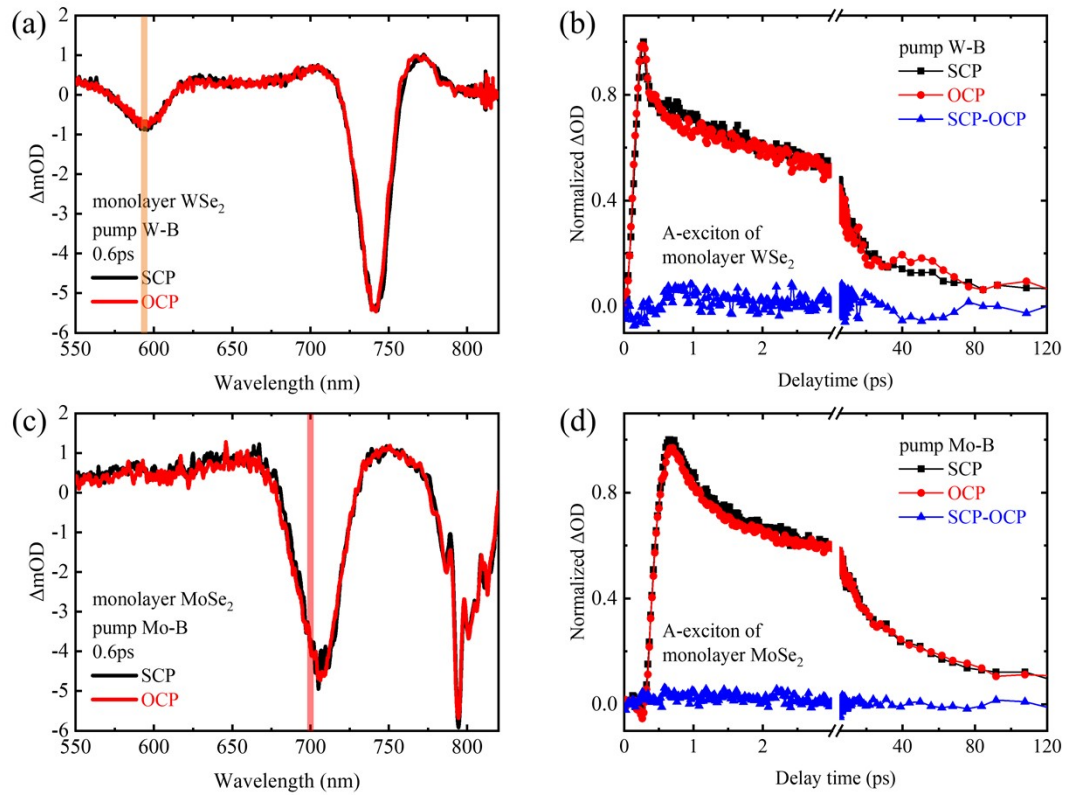

**Figure S5** Spin-valley polarization in monolayer WSe<sub>2</sub> and MoSe<sub>2</sub>. The TA spectra of SCP and OCP detection of a) WSe<sub>2</sub> and c) MoSe<sub>2</sub> at 0.6ps under the condition of B-exciton resonantly pumped. SCP and OCP dynamics of A-exciton of monolayer b) WSe<sub>2</sub> and d) MoSe<sub>2</sub>. The blue trace is the evolution of the difference between SCP and OCP.
